# Supplementary material for: Chaenomeles sinensis Extract Ameliorates Ovalbumin-Induced Allergic Rhinitis by Inhibiting the IL-33/ST2 Axis and Regulating Epithelial Cell Dysfunction
Source: MDPI journal article supplement (doi:10.3390/foods13040611), 2024-02-18
Supplement: s1 [file s1]

# ***Chaenomeles sinensis* extract ameliorates ovalbumin-induced allergic rhinitis by inhibiting the IL-33/ST2 axis and regulating epithelial cell dysfunction**

**Juan Jin<sup>1\*</sup>, Yan Jing Fan<sup>1,2\*</sup>, Thi Van Nguyen<sup>1</sup>, Zhen Nan Yu<sup>1</sup>, Chang Ho Song<sup>1,3</sup>, So-Young Lee<sup>4,5</sup>, Hee Soon Shin<sup>4,5</sup>, Ok Hee Chai<sup>1,3</sup>**

<sup>1</sup> Department of Anatomy, Jeonbuk National University Medical School, Jeonju, 54896, Jeonbuk, Korea

<sup>2</sup> School of Medicine, Liaocheng University, Liaocheng, Shandong, People's Republic of China.

<sup>3</sup> Institute for Medical Sciences, Jeonbuk National University Medical School, Jeonju, 54896, Jeonbuk, Korea

<sup>4</sup> Department of Food Biotechnology, University of Science and Technology (UST), Daejeon 34113, Korea

<sup>5</sup> Division of Food Functionality Research, Korea Food Research Institute (KFRI), Wanju 55365, Korea

**Correspondence:** Ok Hee Chai, Department of Anatomy and Institute for Medical Sciences, Jeonbuk National University Medical School, Jeonju, 54896, Jeonbuk, Korea. Tel: +82-63-2703109, Fax: +82-63-2749880. Email: okchai1004@jbnu.ac.kr.

\* These authors contributed equally to this work.

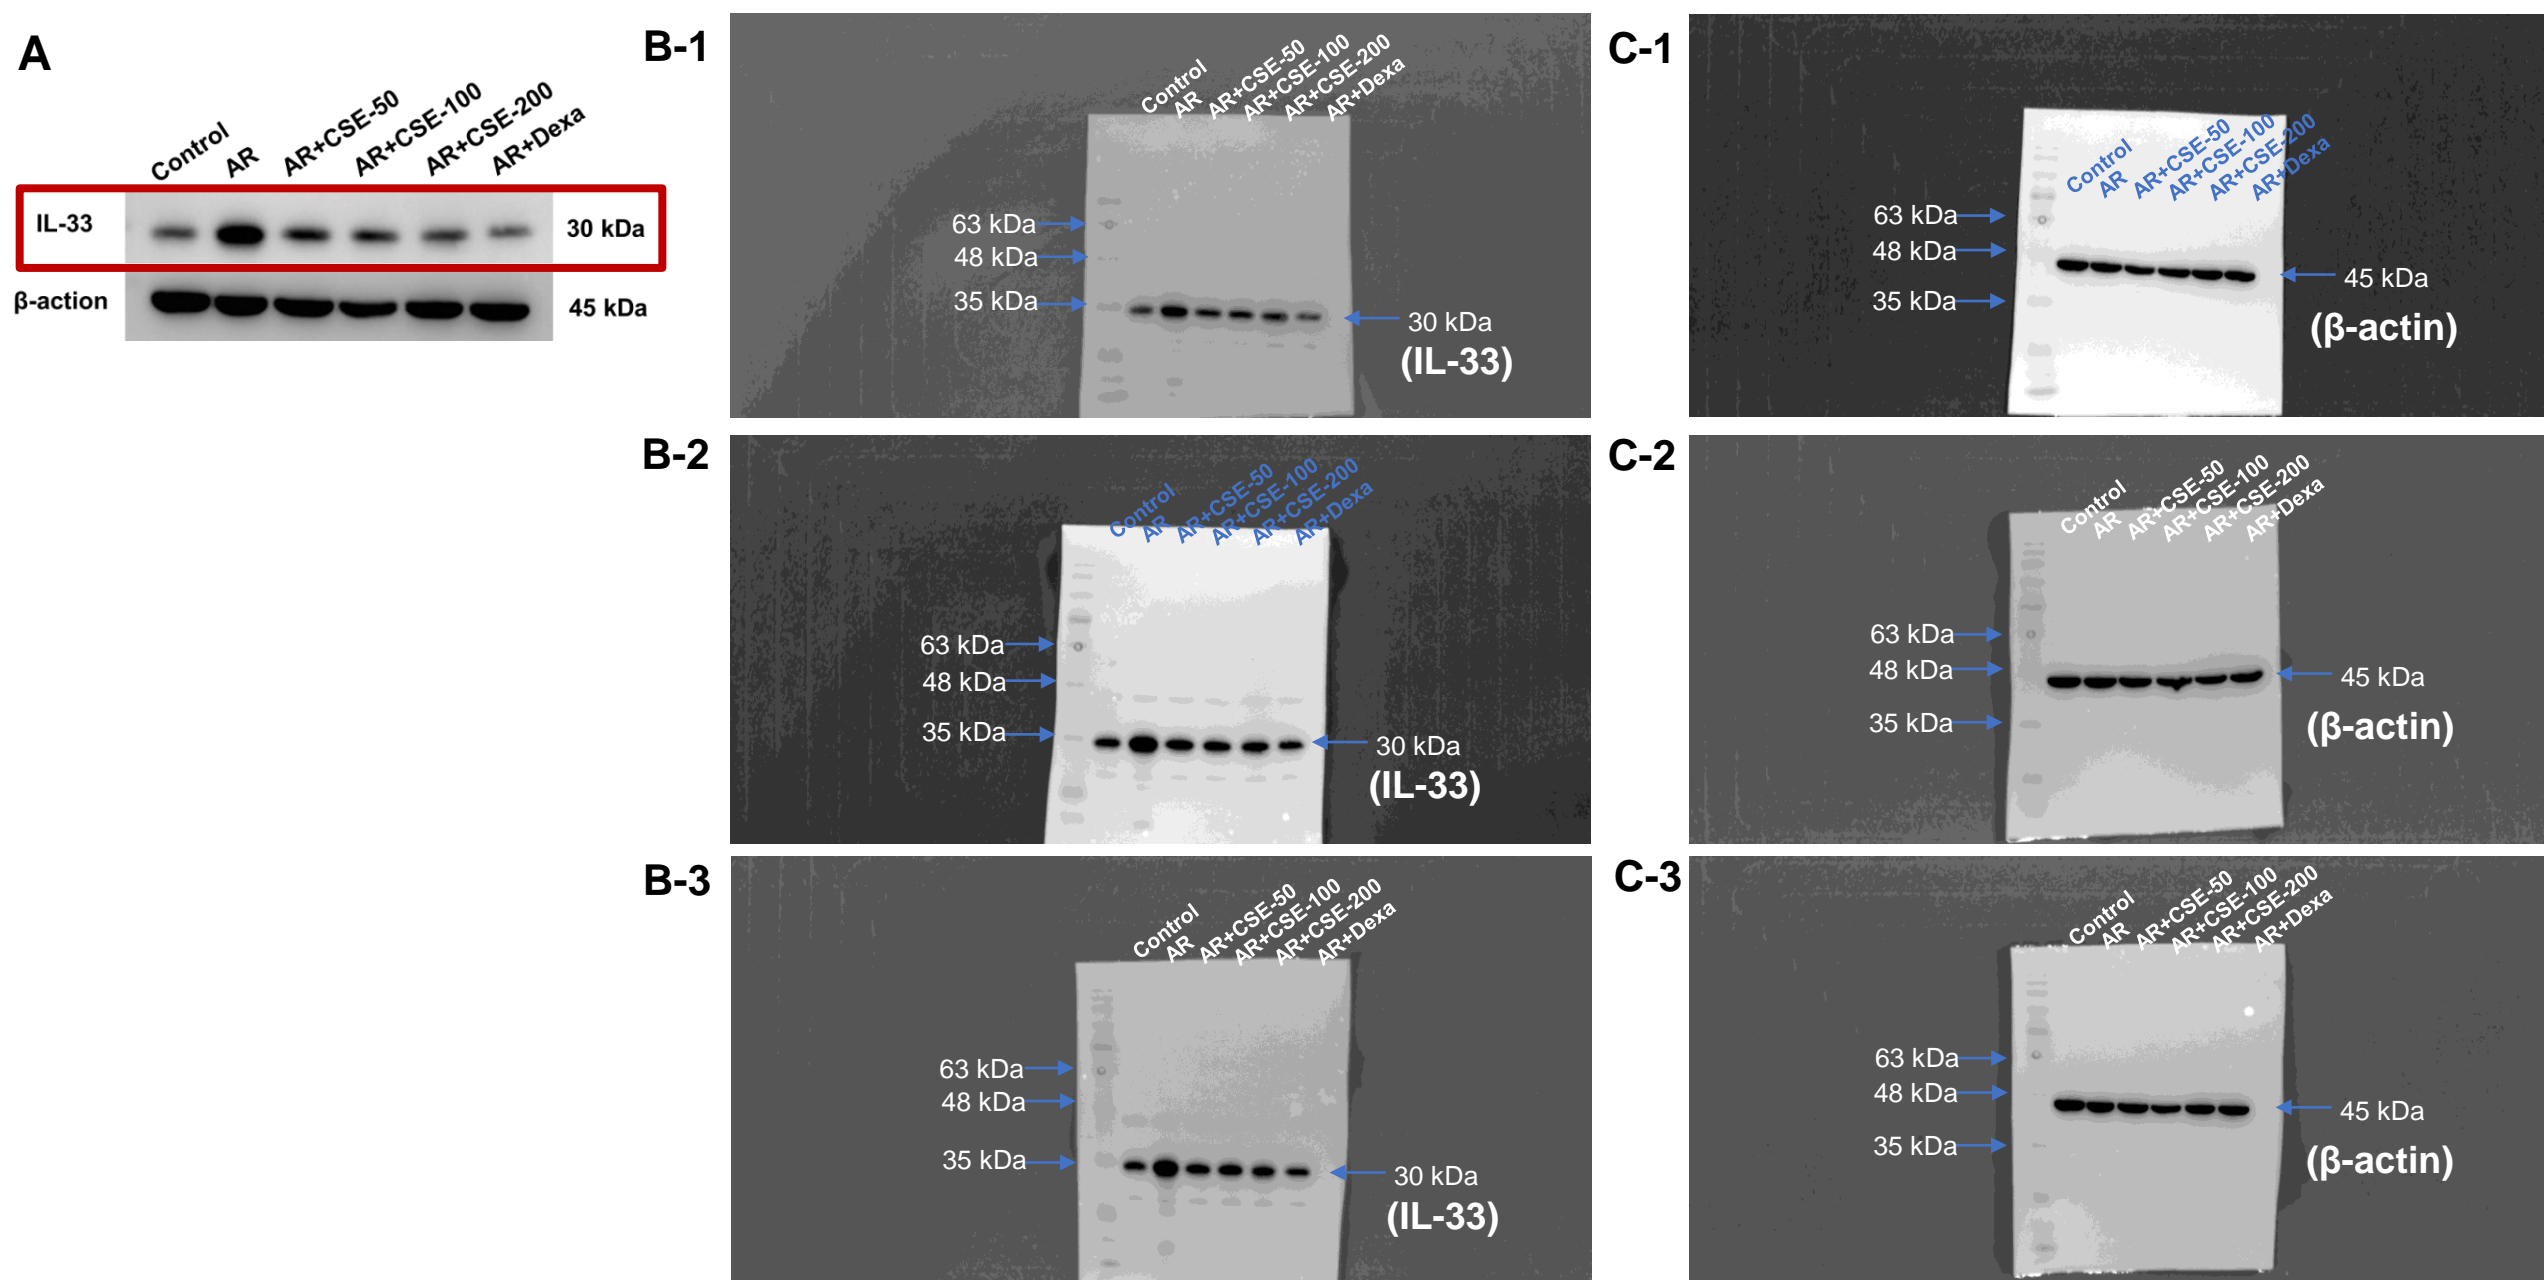

Figure S1. Full-length gels and blots of IL-33 signaling-related proteins in lung tissues (A) Western blot data. Original Western blot picture of (B) IL-33 and (C) β-actin. Membrane C was stripped from membrane B.

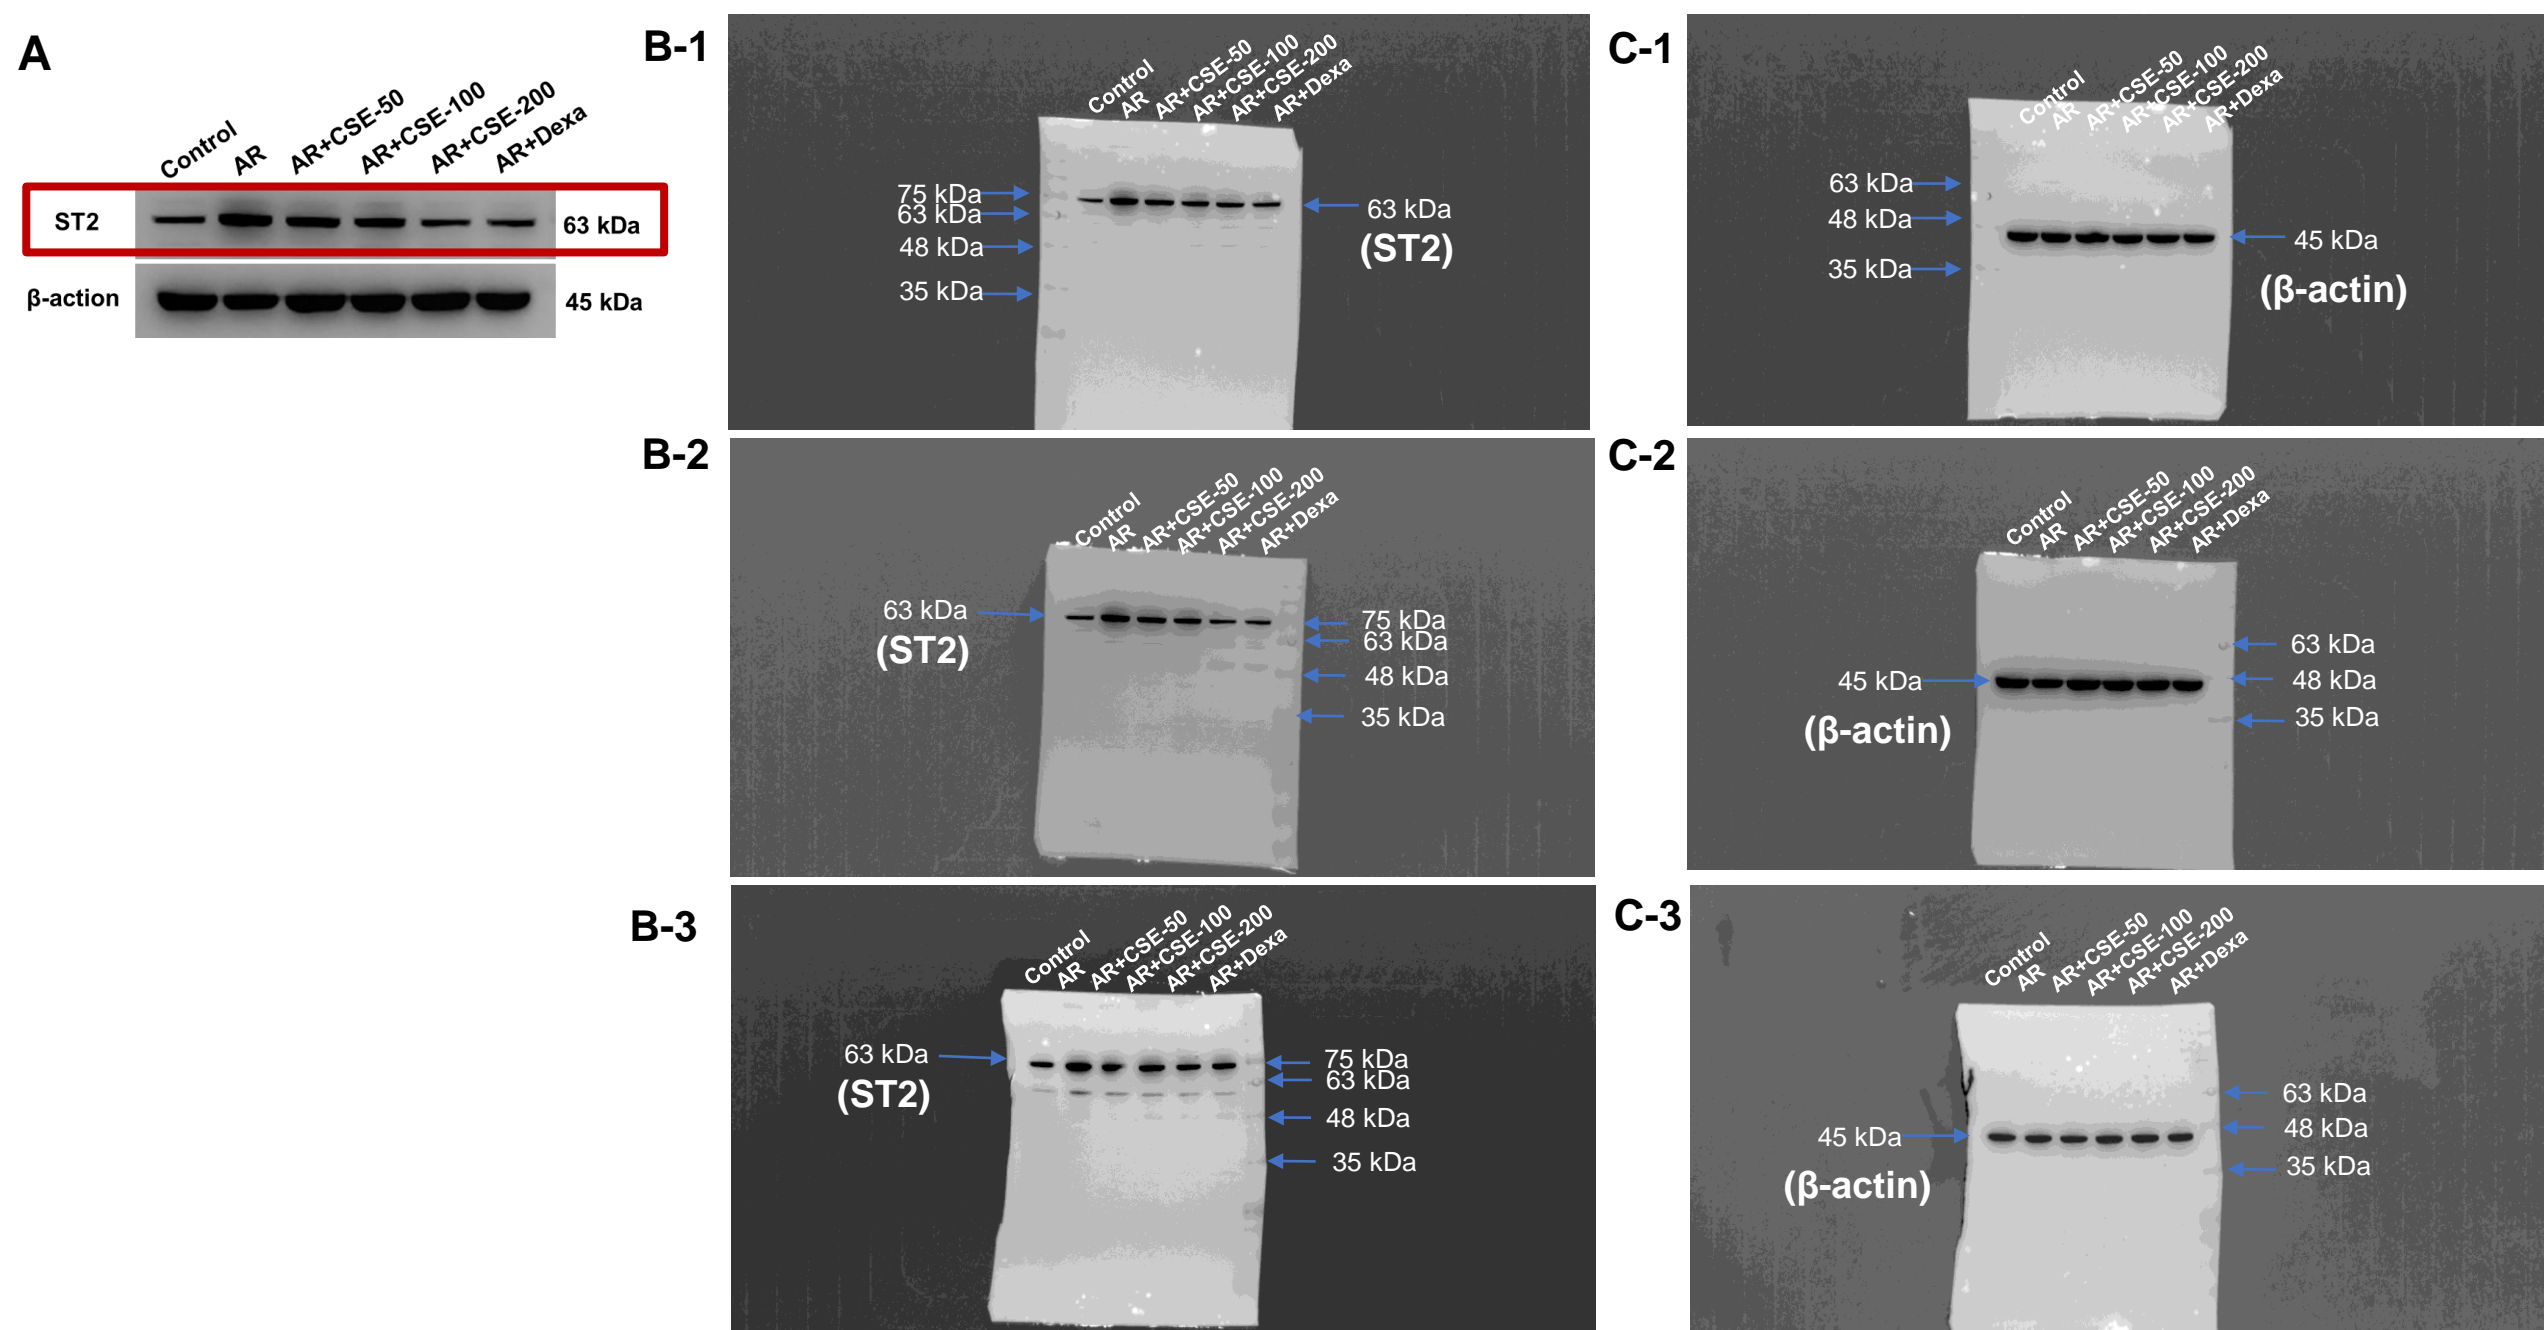

Figure S2. Full-length gels and blots of ST2 signaling-related proteins in lung tissues (A) Western blot data. Original Western blot picture of (B) IL-33 and (C) β-actin. Membrane C was stripped from membrane B.
